# Supplementary material for: Multivalent Protein–Nucleic Acid Interactions Probed by Composition-Gradient Multiangle Light Scattering
Source: PubMed Central journal article supplement — ACS Omega. 2024 Sep 21;9(39):41003–10. doi: 10.1021/acsomega.4c06358 (PMC11447847; doi:10.1021/acsomega.4c06358), 2024-09-21
Supplement: ao4c06358_si_001.pdf [file ao4c06358_si_001.pdf]

## Supplementary Information

### **Multivalent protein-nucleic acid interactions probed by composition-gradient multi-angle light scattering**

Josephine C. Ferreon<sup>1\*</sup>, Natee Kongchan<sup>2</sup>, Phoebe S. Tsoi<sup>1</sup>, Kyoung-Jae Choi<sup>1</sup>, Sophia Kenrick<sup>3\*</sup>, Joel Neilson<sup>2\*</sup>, Allan Chris M. Ferreon<sup>1\*</sup>

<sup>1</sup>Department of Biochemistry and Molecular Pharmacology, Baylor College of Medicine, Houston, TX, USA

<sup>2</sup>Department of Integrative Physiology, Baylor College of Medicine, Houston, TX 77030, USA

<sup>3</sup>Wyatt Technology, LLC, Santa Barbara, CA, USA

\*Correspondence: josephine.ferreon@bcm.edu, sophia\_kenrick@waters.com, neilson@bcm.edu, allan.ferreon@bcm.edu

Keywords: TDP43, CELF1, UG repeats, TG repeats, NANOG promoter, multi-angle light scattering, composition gradient, CG-MALS, EMSA, electrophoretic mobility shift assay, nucleic acid, RNA-binding proteins, DNA-binding proteins, multivalent interactions

| Table S1. Molecular weights (MW) of components. |                             |                                  |                             |
|-------------------------------------------------|-----------------------------|----------------------------------|-----------------------------|
| Protein:Nucleic acid Complex                    | MW <sub>protein</sub> (kDa) | MW <sub>nucleic acid</sub> (kDa) | bp no. (5'-3') <sup>b</sup> |
| TDP43 <sup>RRM1</sup> :(TG) <sub>6</sub>        | 12.0                        | 3.7                              | 12                          |
| TDP43 <sup>RRM1</sup> :(GT) <sub>12</sub>       | 12.0                        | 7.5                              | 24                          |
| CELF1 <sup>RRM1-2</sup> :(UGUU) <sub>4</sub>    | 21.1                        | 5.0                              | 16                          |
| CELF1 <sup>RRM1-2</sup> :(GU) <sub>22</sub>     | 21.1                        | 14.3                             | 44                          |
| <sup>b</sup> bp = base pairs                    |                             |                                  |                             |

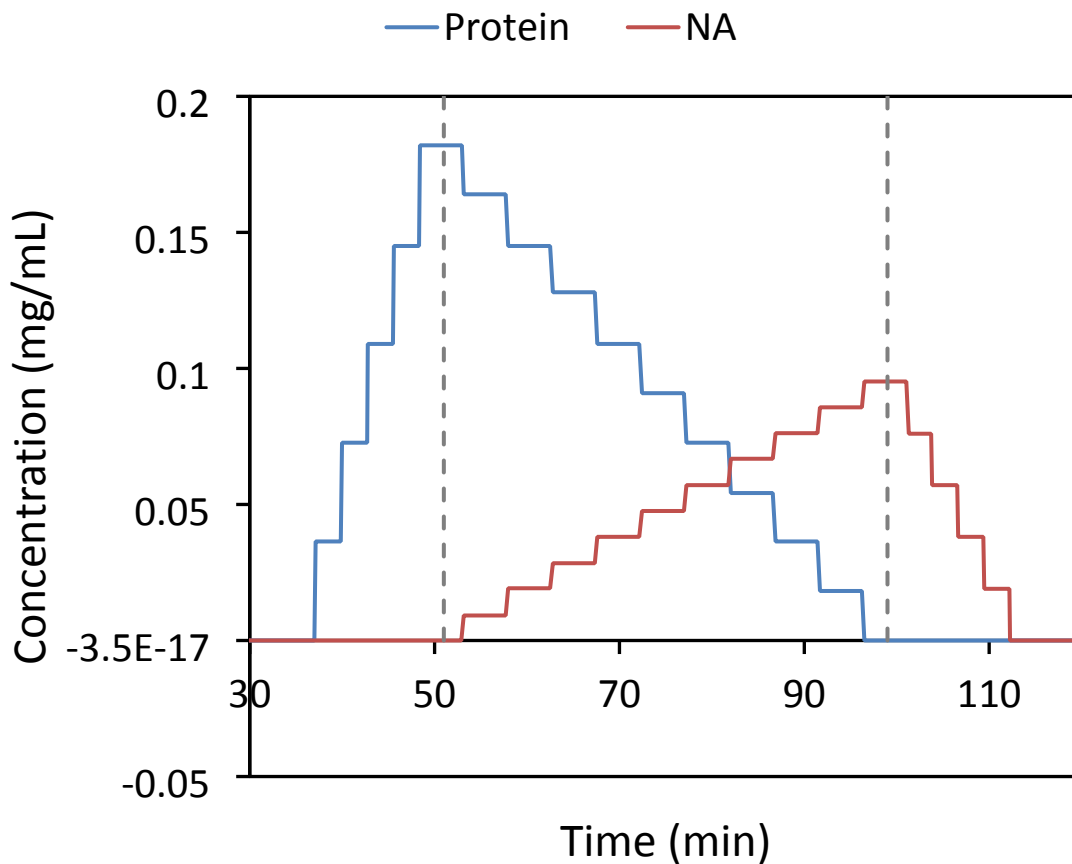

Figure S1 | CG-MALS example method with varying protein and nucleic acid concentrations.
